# Supplementary material
Source: PubMed Central journal article supplement (PMC4229575)

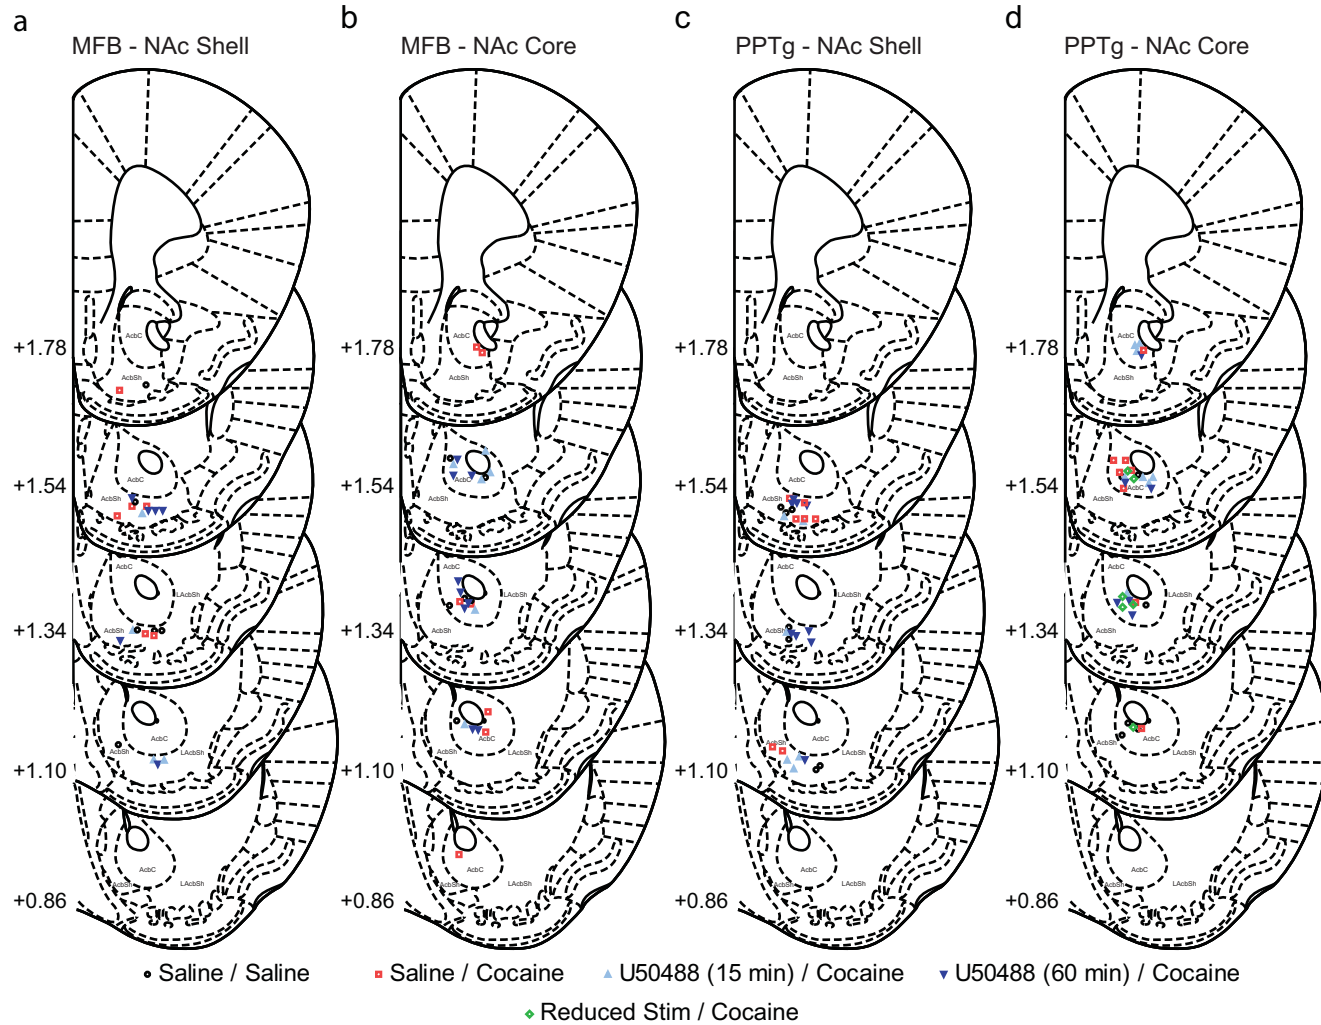

Supplement: npp2014157x1.pdf [file npp2014157x1.pdf]

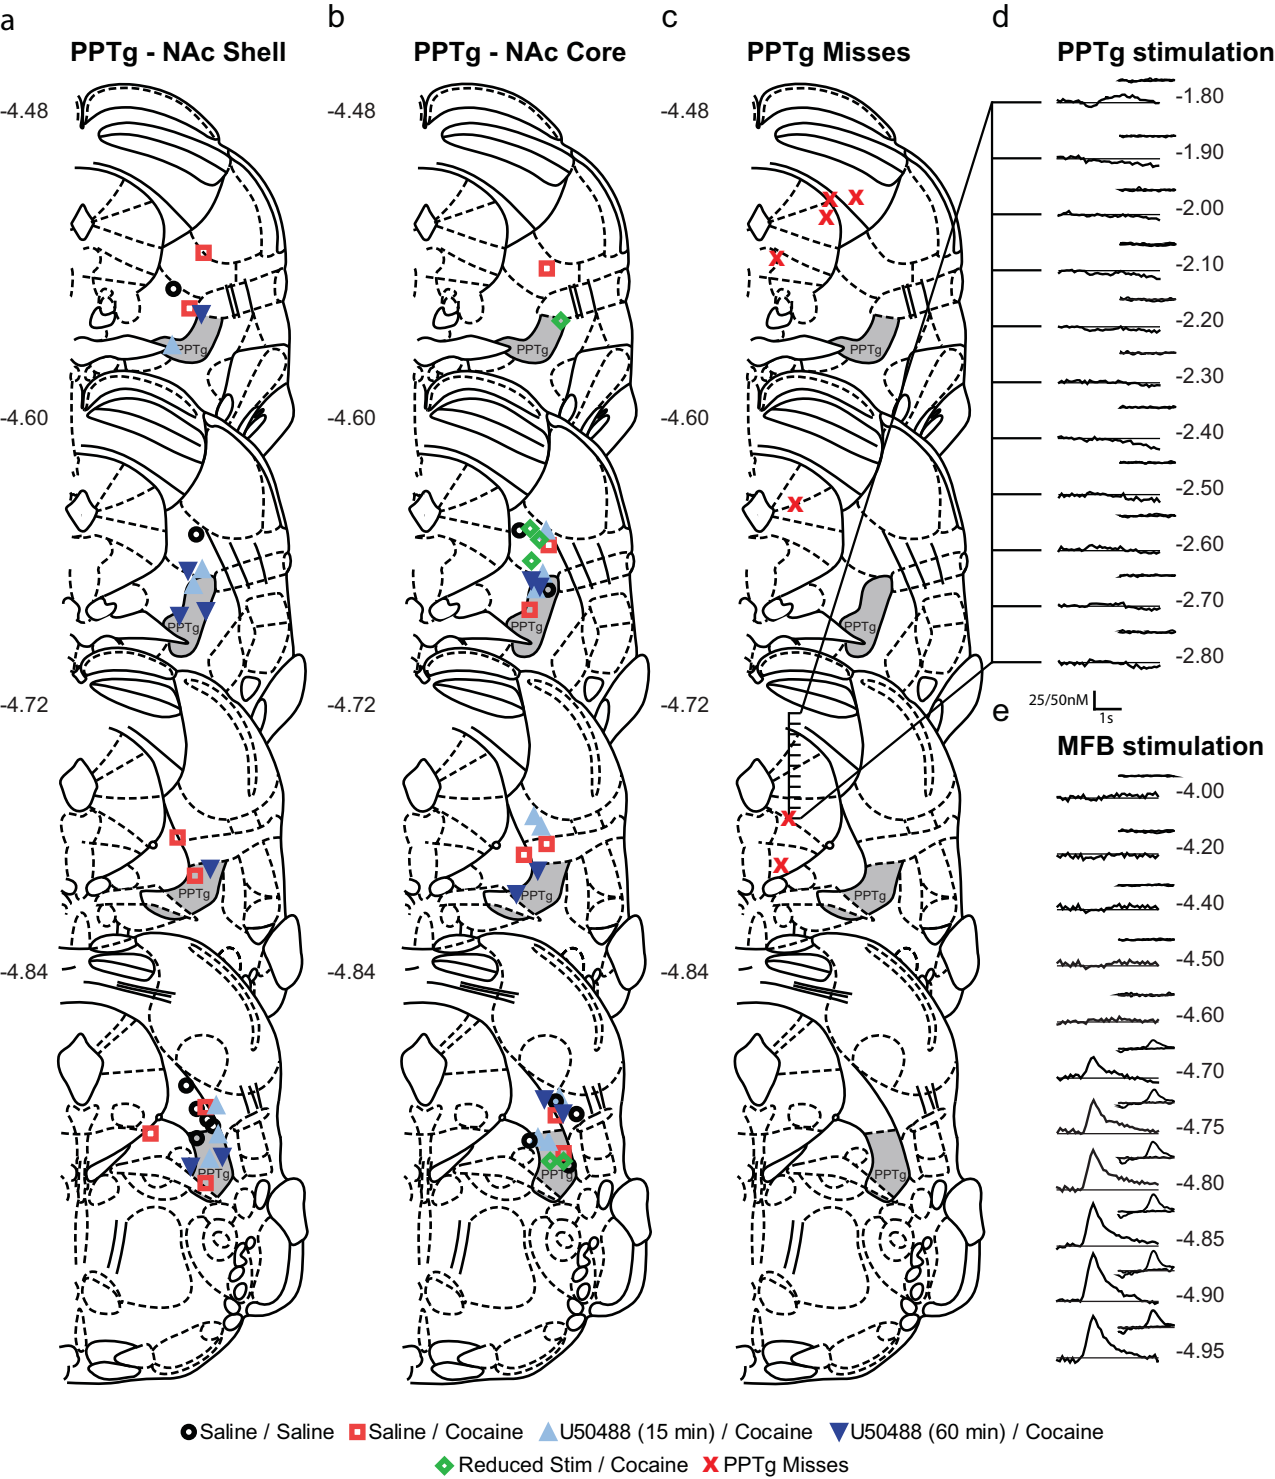

Supplement: npp2014157x2.pdf [file npp2014157x2.pdf]

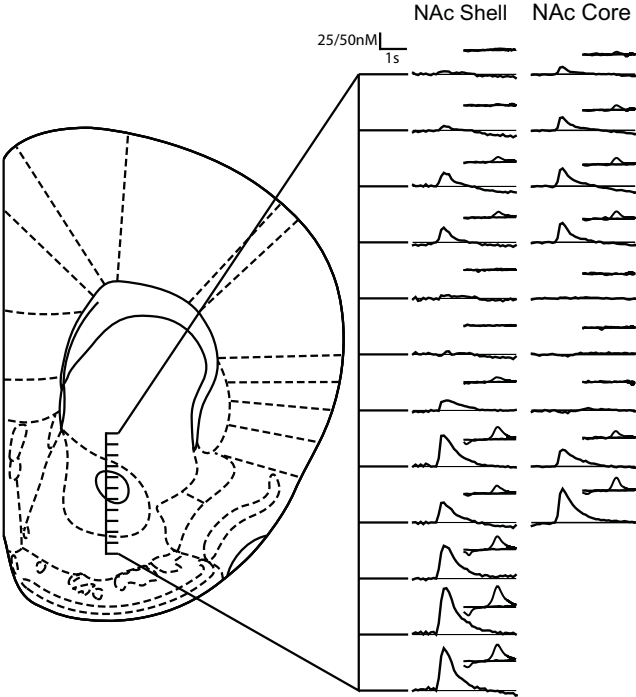

Supplement: npp2014157x3.pdf [file npp2014157x3.pdf]

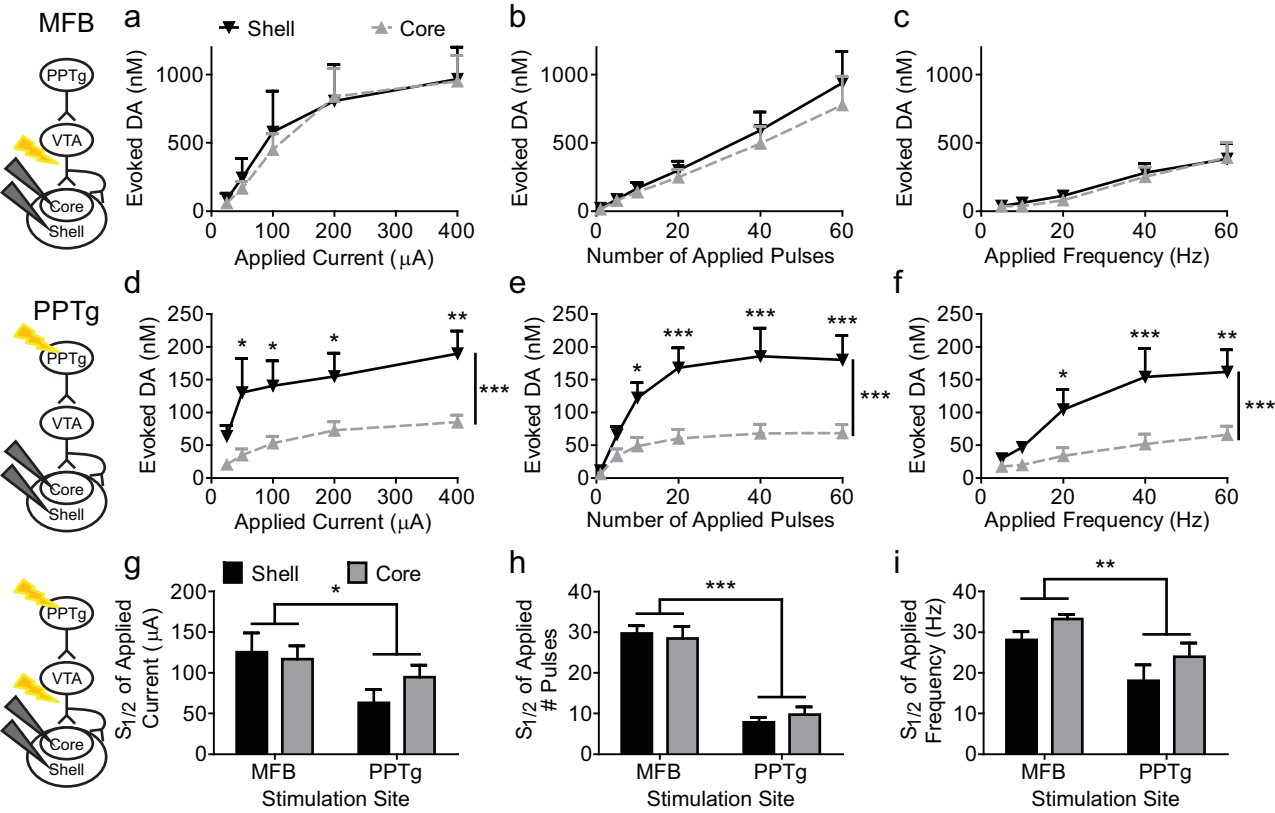

Supplement: npp2014157x4.pdf [file npp2014157x4.pdf]

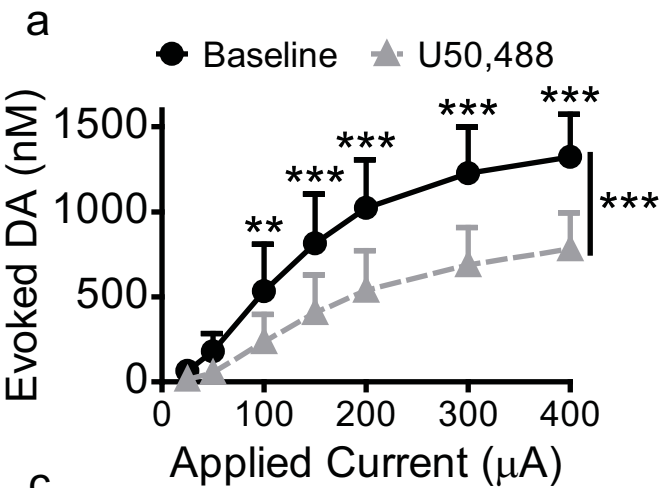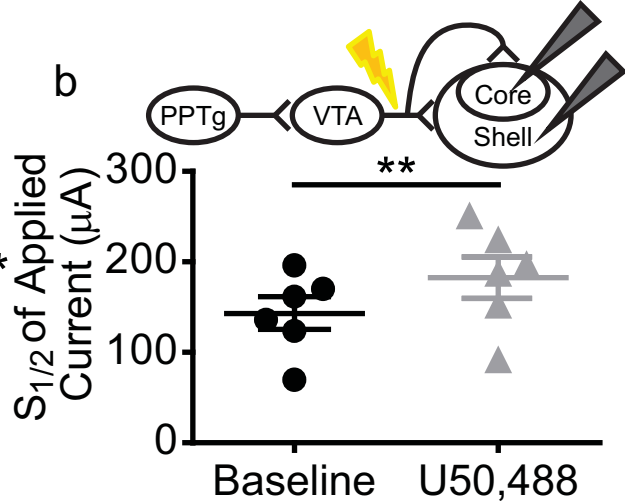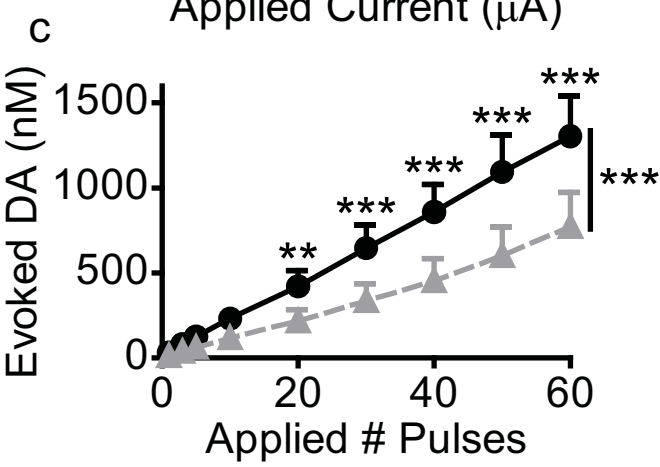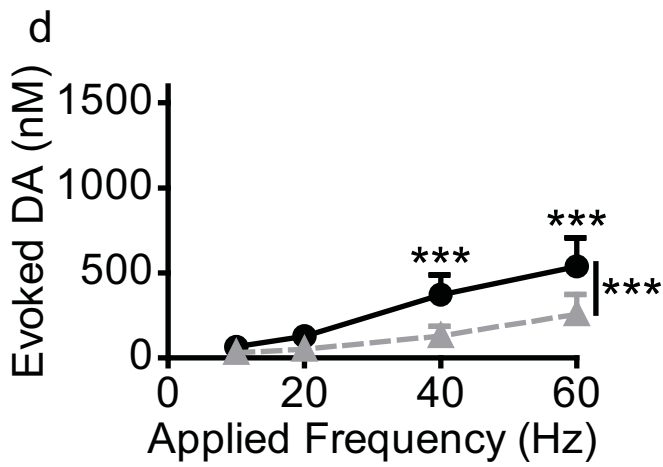

Supplement: npp2014157x5.pdf [file npp2014157x5.pdf]

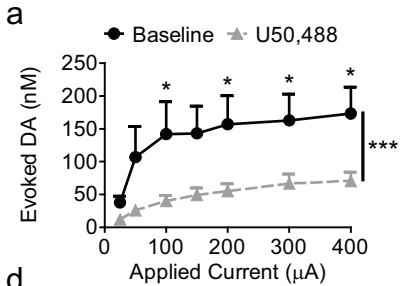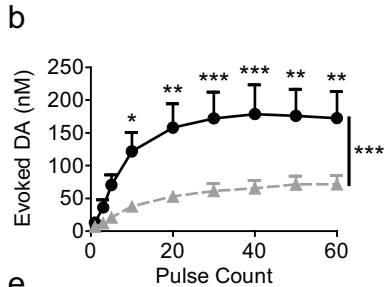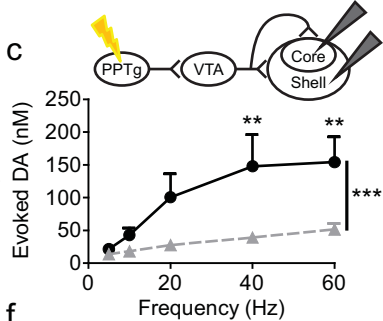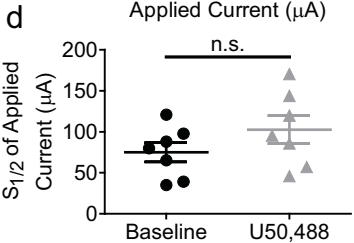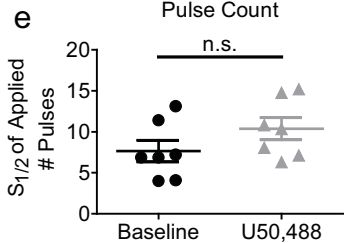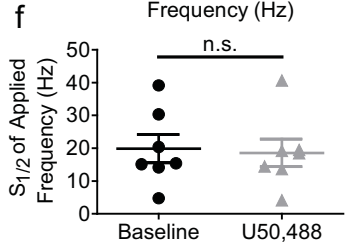

Supplement: npp2014157x6.pdf [file npp2014157x6.pdf]

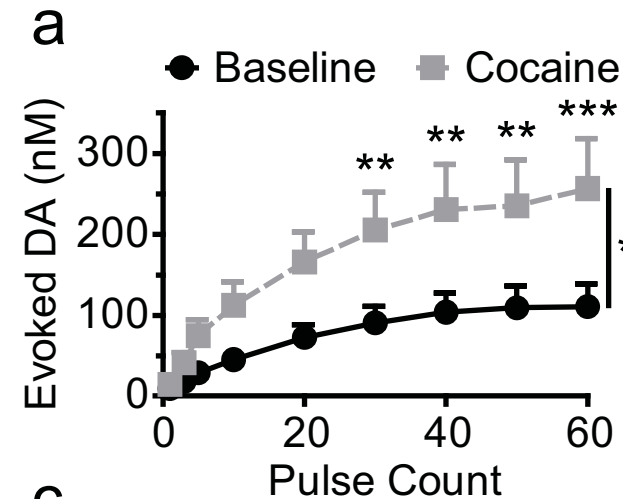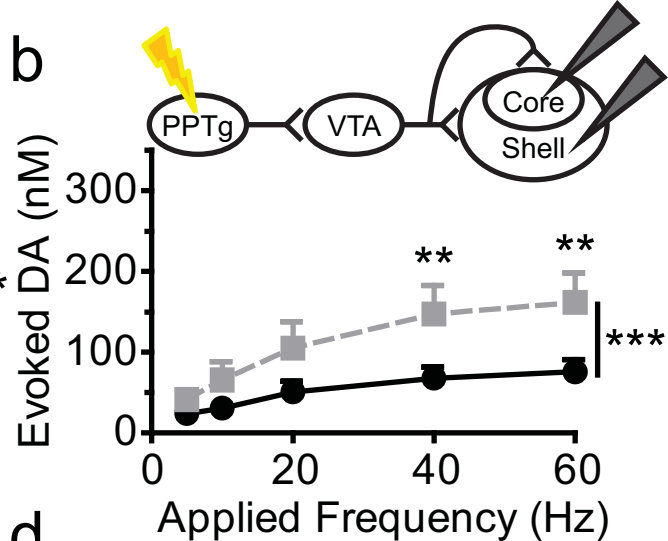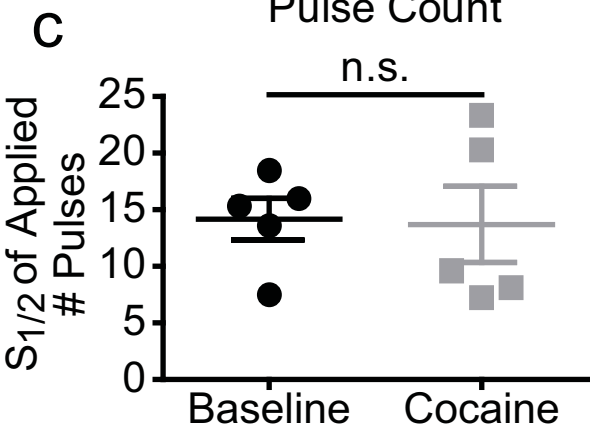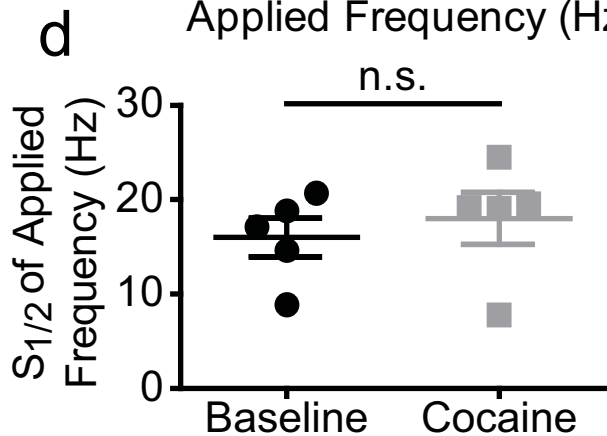

Supplement: npp2014157x7.pdf [file npp2014157x7.pdf]

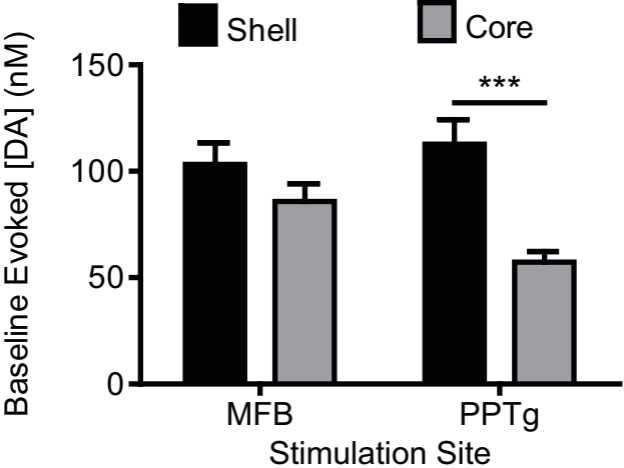

Supplement: npp2014157x8.pdf [file npp2014157x8.pdf]

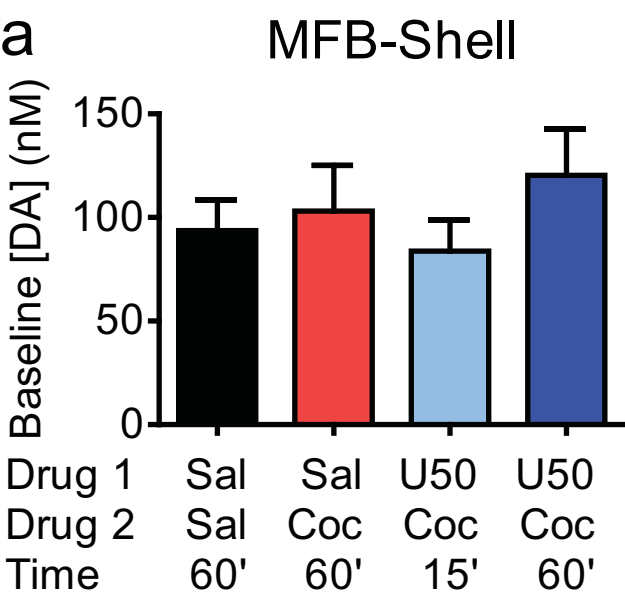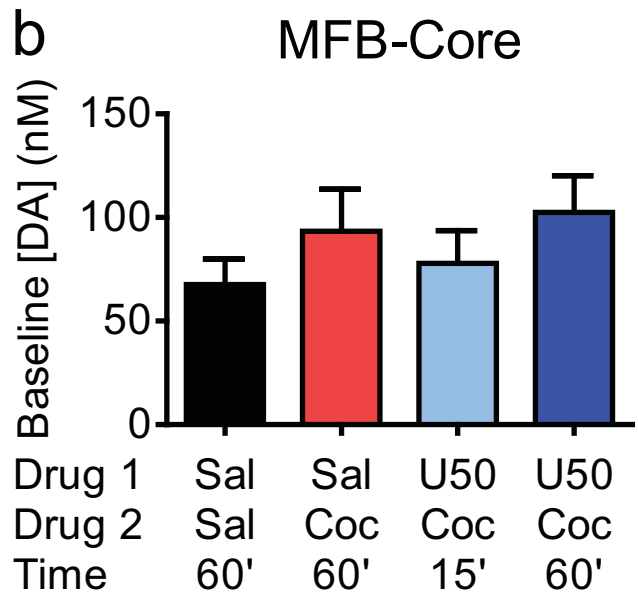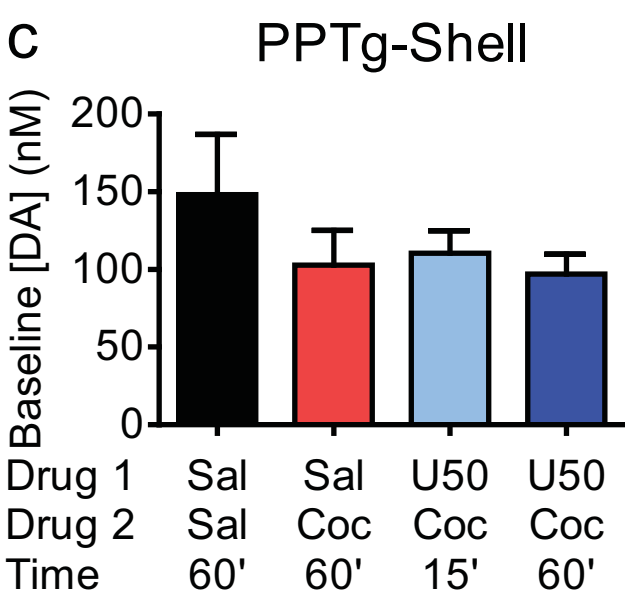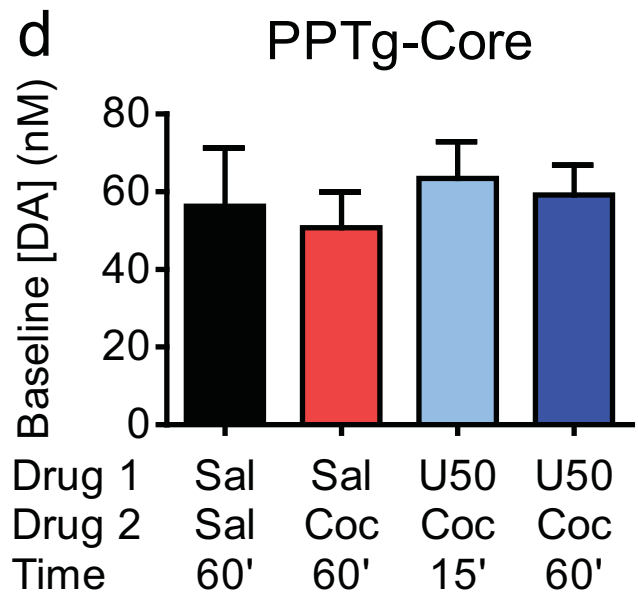

Supplement: npp2014157x9.pdf [file npp2014157x9.pdf]
